# Supplementary material for: Effects of cognitive behavior therapy on patients with chronic whiplash-associated disorders: a systematic review and meta-analysis
Source: Research Square preprint supplement (doi:10.21203/rs.3.rs-1360019/v2), 2022-02-21
Supplement: Supplementary file 1 [file d3a123f68dc0a0b59ce2625c.docx]

Database: Ovid MEDLINE(R) and Epub Ahead of Print, In-Process & Other Non-Indexed Citations and Daily <1946 to January 13, 2021>

Search Strategy:

--------------------------------------------------------------------------------

1 exp Neck Injuries/

2 exp "Sprains and Strains"/

3 exp Neck Pain/

4 exp Accidents, Traffic/

5 exp Neck Muscles/

6 whiplash associated disorder.mp.

7 whiplash.mp.

8 WAD.mp.

9 cervical strain.mp.

10 neck injur$.mp.

11 (sprain$ and strain$).mp.

12 ((accident$ or Traffic) adj4 neck pain$).mp.

13 1 or 2 or 3 or 4 or 5 or 6 or 7 or 8 or 9 or 10 or 11 or 12 (83328)

14 exp Behavior Therapy/

15 pain management.mp. or exp Pain Management/

16 behavio?r therapy.mp.

17 mindfulness.mp. or Mindfulness/

18 cognitive behavio?ral therapy.mp.

19 (acceptance and commitment therapy).mp.

20 relaxation therapy.mp.

21 operant conditioning.mp.

22 respondent treatment.mp.

23 cognitive therapy.mp.

24 graded activity.mp.

25 phycotherapy.mp.

26 functional analytic phycotherapy.mp.

27 biofeedback.mp. or exp Biofeedback, Psychology/

28 pain education.mp.

29 exp Patient Education as Topic/

30 14 or 15 or 16 or 17 or 18 or 19 or 20 or 21 or 22 or 23 or 24 or 25 or 26 or 27 or 28 or 29

31 randomized controlled trial.mp.

32 controlled clinical trial.mp.

33 randomized.mp.

34 placebo.mp.

35 drug therapy.mp.

36 randomly.mp.

37 trial.mp.

38 groups.mp.

39 31 or 32 or 33 or 34 or 35 or 36 or 37 or 38

40 humans.mp.

41 39 and 40

42 13 and 30 and 41 (538)

Database: Emcare 1995 to present & Embase Classic + Embase 1947 to 2021 January 13

Search Strategy:

--------------------------------------------------------------------------------

1 exp neck injury/ (5737)

2 (Sprains and Strains).mp. [mp=title, abstract, heading word, drug trade name, original title, device manufacturer, drug manufacturer, device trade name, keyword] (558)

3 Neck Pain.mp. or exp neck pain/ (11197)

4 exp traffic accident/ (20356)

5 exp neck muscle/ (4625)

6 exp whiplash injury/ (2058)

7 whiplash associated disorder.mp. [mp=title, abstract, heading word, drug trade name, original title, device manufacturer, drug manufacturer, device trade name, keyword] (275)

8 whiplash.mp. [mp=title, abstract, heading word, drug trade name, original title, device manufacturer, drug manufacturer, device trade name, keyword] (2329)

9 WAD.mp. [mp=title, abstract, heading word, drug trade name, original title, device manufacturer, drug manufacturer, device trade name, keyword] (519)

10 cervical strain.mp. [mp=title, abstract, heading word, drug trade name, original title, device manufacturer, drug manufacturer, device trade name, keyword] (17)

11 neck injur$.mp. [mp=title, abstract, heading word, drug trade name, original title, device manufacturer, drug manufacturer, device trade name, keyword] (3166)

12 (sprain$ and strain$).mp. [mp=title, abstract, heading word, drug trade name, original title, device manufacturer, drug manufacturer, device trade name, keyword] (1001)

13 ((accident$ or Traffic) adj4 neck pain$).mp. [mp=title, abstract, heading word, drug trade name, original title, device manufacturer, drug manufacturer, device trade name, keyword] (31)

14 1 or 2 or 3 or 4 or 5 or 6 or 7 or 8 or 9 or 10 or 11 or 12 or 13 (41173)

15 exp behavior therapy/ (16289)

16 pain management.mp. (18110)

17 behavio?r therapy.mp. (18735)

18 exp mindfulness/ or mindfulness.mp. (7233)

19 cognitive behavio?ral therapy.mp. [mp=title, abstract, heading word, drug trade name, original title, device manufacturer, drug manufacturer, device trade name, keyword] (12729)

20 (acceptance and commitment therapy).mp. [mp=title, abstract, heading word, drug trade name, original title, device manufacturer, drug manufacturer, device trade name, keyword] (1106)

21 relaxation therapy.mp. [mp=title, abstract, heading word, drug trade name, original title, device manufacturer, drug manufacturer, device trade name, keyword] (300)

22 operant conditioning.mp. [mp=title, abstract, heading word, drug trade name, original title, device manufacturer, drug manufacturer, device trade name, keyword] (436)

23 respondent treatment.mp. [mp=title, abstract, heading word, drug trade name, original title, device manufacturer, drug manufacturer, device trade name, keyword] (5)

24 cognitive therapy.mp. [mp=title, abstract, heading word, drug trade name, original title, device manufacturer, drug manufacturer, device trade name, keyword] (19083)

25 graded activity.mp. [mp=title, abstract, heading word, drug trade name, original title, device manufacturer, drug manufacturer, device trade name, keyword] (114)

26 phycotherapy.mp. [mp=title, abstract, heading word, drug trade name, original title, device manufacturer, drug manufacturer, device trade name, keyword] (0)

27 functional analytic phycotherapy.mp. [mp=title, abstract, heading word, drug trade name, original title, device manufacturer, drug manufacturer, device trade name, keyword] (0)

28 biofeedback.mp. or exp biofeedback/ (3657)

29 pain education.mp. (416)

30 15 or 16 or 17 or 18 or 19 or 20 or 21 or 22 or 23 or 24 or 25 or 26 or 27 or 28 or 29 (65386)

31 randomized controlled trial.mp. [mp=title, abstract, heading word, drug trade name, original title, device manufacturer, drug manufacturer, device trade name, keyword] (268926)

32 controlled clinical trial.mp. [mp=title, abstract, heading word, drug trade name, original title, device manufacturer, drug manufacturer, device trade name, keyword] (72770)

33 randomized.mp. [mp=title, abstract, heading word, drug trade name, original title, device manufacturer, drug manufacturer, device trade name, keyword] (351976)

34 placebo.mp. [mp=title, abstract, heading word, drug trade name, original title, device manufacturer, drug manufacturer, device trade name, keyword] (114250)

35 drug therapy.mp. [mp=title, abstract, heading word, drug trade name, original title, device manufacturer, drug manufacturer, device trade name, keyword] (86119)

36 randomly.mp. [mp=title, abstract, heading word, drug trade name, original title, device manufacturer, drug manufacturer, device trade name, keyword] (141112)

37 trial.mp. [mp=title, abstract, heading word, drug trade name, original title, device manufacturer, drug manufacturer, device trade name, keyword] (563376)

38 groups.mp. [mp=title, abstract, heading word, drug trade name, original title, device manufacturer, drug manufacturer, device trade name, keyword] (688259)

39 31 or 32 or 33 or 34 or 35 or 36 or 37 or 38 (1271373)

40 human$.mp. [mp=title, abstract, heading word, drug trade name, original title, device manufacturer, drug manufacturer, device trade name, keyword] (4761113)

41 39 and 40 (1048246)

42 14 and 30 and 41 (282)

Database: CINAHL plus

search Strategy:

--------------------------------------------------------------------------------

S1 (MH "Neck Injuries+")

S2 (MH "Sprains and Strains+")

S3 (MH "Neck Pain")

S4 (MH "Accidents, Traffic")

S5 (MH "Neck Muscles+")

S6 whiplash associated disorder

S7 (MH "Whiplash Injuries") OR "whiplash"

S8 WAD

S9 cervical sprain

S10 neck injur$

S11 (sprain$ and strain$)

S12 ((accident$ or Traffic) adj4 neck pain$)

S13 S1 OR S2 OR S3 OR S4 OR S5 OR S6 OR S7 OR S8 OR S9 OR S10 OR S11 OR S12

S14 (MH "Behavior Therapy+")

S15 (MH "Pain Management")

S16 behavior therapy

S17 (MH "Mindfulness")

S18 cognitive behavioral therapy

S19 acceptance and commitment therapy

S20 relaxation therapy

S21 operant conditioning

S22 respondent treatment

S23 cognitive therapy

S24 graded activity

S25 phycotherapy

S26 functional analytic phycotherapy

S27 biofeedback

S28 pain education

S29 (MH "Patient Education+")

S30 S14 OR S15 OR S16 OR S17 OR S18 OR S19 OR S20 OR S21 OR S22 OR S23 OR S24

OR S25 OR S26 OR S27 OR S28 OR S29

S31 (MH "Randomized Controlled Trials+") OR "randomized controlled trial"

S32 (MH "Clinical Trials") OR "controlled clinical trial"

S33 randomized

S34 (MH "Placebos") OR "placebo"

S35 (MH "Drug Therapy+") OR "drug therapy"

S36 randomly

S37 trial

S38 groups

S39 S31 OR S32 OR S33 OR S34 OR S35 OR S36 OR S37 OR S38

S40 humans

S41 S39 AND S40

S42 S13 AND S30 AND S41

PEDro

Abstract & Title: Whip*

Body Part: head or neck

Method: clinical trial

Web of science

Citations and Daily <1990 to 2021>

Search Strategy:

TS= (((Chronic or musculoskeletal or Whiplash) NEAR/3 (neck or cervical) NEAR/3 (pain* or disorder or ache)) AND (((behavi* or cogni*) NEAR/2 therap*) or (biopsychosocial or multidisciplinary or multiprofession* or interdisciplina* or multimodal)))
